# Supplementary material for: Development and Molecular Cytogenetic Identification of Two Wheat-Aegilops geniculata Roth 7Mg Chromosome Substitution Lines with Resistance to Fusarium Head Blight, Powdery Mildew and Stripe Rust
Source: MDPI journal article supplement (doi:10.3390/ijms23137056), 2022-06-24
Supplement: s1 [file s1]

Supplementary Materials for

**Development and Molecular Cytogenetic identification**

**of Two Wheat-*Aegilops geniculata* Roth 7M<sup>s</sup>**

**Chromosome Substitution Lines with Resistance to**

**Fusarium Head Blight, Powdery Mildew, and Stripe**

**Rust**

Xiaoying Yang<sup>1</sup>, Maoru Xu<sup>1</sup>, Yongfu Wang<sup>1</sup>, Xiaofang Cheng<sup>1</sup>, Chenxi Huang<sup>1</sup>,

Hong Zhang<sup>1,2,3</sup>, Chunhuan Chen<sup>1,2,3</sup>, Yajuan Wang<sup>1,2,3,\*</sup>, Wanquan Ji<sup>1,2,3,\*</sup>

Correspondence authors: Yajuan Wang, E-mail address: wangyj7604@163.com;

Wanquan Ji, E-mail address: jiwanquan2008@126.com

**This word file includes:**

Figures S1 to S3

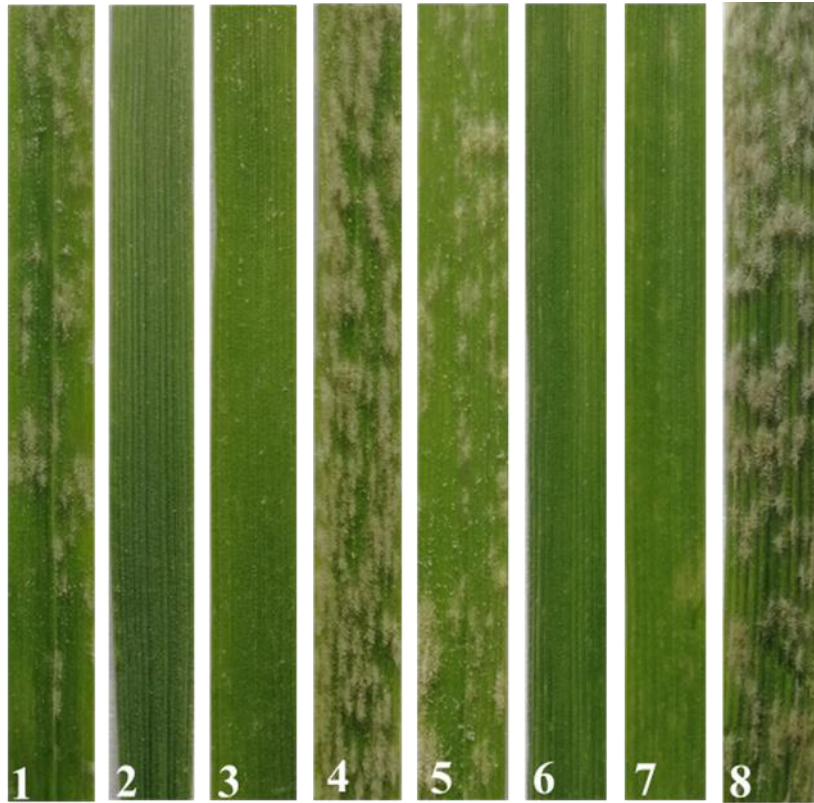

**Figure S1.** Leaves infected with *Blumeria graminis* at the seeding stage. 1. *Triticum aestivum* cv. Chinese Spring; 2. *Ae. geniculata*; 3. wheat- *Ae. geniculata* 7M<sup>s</sup> addition line W166; 4. Abbondanza deletion line 7A; 5. Abbondanza deletion line 7B; 6. W623; 7. W637; 8. Shaanyou 225.

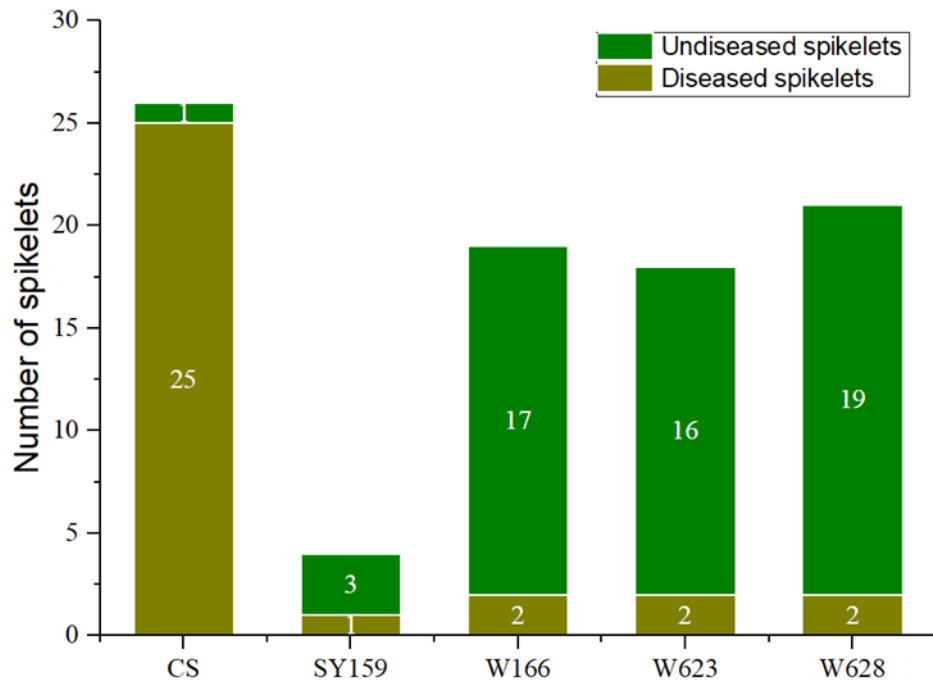

**Figure S2.** Number of diseased spikelets 21 days after single floret inoculation.

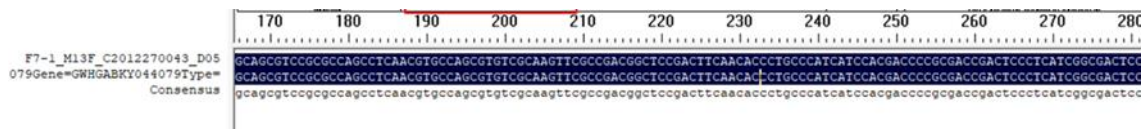

**Figure S3.** Sequence alignment of *GST* for development of *Fhb7* for development of the *F7-1* marker. The above sequence was obtained by sequencing the specific fragment amplified in *Th. Elongatum*, and the following sequence is the *GST* gene sequence.
